# Supplementary material for: Homogenization of the historical series from the Coimbra MagneticObservatory, Portugal
Source: Copernicus journal article supplement (doi:10.5194/essd-2020-317), 2020-10-31
Supplement: Supplementary file 1 [file essd-2020-317-supplement.pdf]

# Homogenization of the historical series from the Coimbra Magnetic Observatory, Portugal

A. L. Morozova<sup>1</sup>, P. Ribeiro<sup>1,2</sup>, and M. A. Pais<sup>1</sup>

<sup>1</sup> University of Coimbra, CITEUC, Department of Physics, Coimbra, Portugal

<sup>2</sup> University of Coimbra, CITEUC, OGAUC, Coimbra, Portugal

*Correspondence to:* A.L. Morozova (annamorozovauc@gmail.com)

## Supplementary Material

Tables S1-S4 contain metadata (dates of the instrument replacements, relocations, changes in the measurement/calculation procedures etc.) for the COI H, I, Z and D geomagnetic field components, respectively.

Table S5 contains a list of European geomagnetic observatories whose data were used as reference series for the COI H, I and Z series.

Figure S1 shows variations of the COI SV series.

Figure 2 shows differences between COV-OBS model estimations calculated with all available stations data and without COI data.

Figures S3-S9 show homogeneity tests statistics for the original and corrected COI H (S3-S5), I (S6-S7) and Z (S8-S9) series.

Figure S10 shows time derivative of the COI H, I and Z series on the month-to-month time scale.

Figure S11 shows  $\Delta H$  series for COI and several reference observatories (SFS, PRA, PER, OSL, PSM and GRW).

Figure S12 allows to compare COI Z variations for the 1990-2006 period with monthly mean COI temperature series.

**Table S1**

Metadata for the H data set: dates of the instrument replacements, relocations, changes in the measurement/calculation procedures etc.

|                       | date                            | metadata                                                                                                                                                    |
|-----------------------|---------------------------------|-------------------------------------------------------------------------------------------------------------------------------------------------------------|
| <i>Cumeada</i>        | 1866 June                       | beginning of measurements at <i>Cumeada</i>                                                                                                                 |
|                       | 1878 January                    | installation of the Unifilar of Elliott, precision 1 nT                                                                                                     |
|                       | 1929 May                        | opening of the electrical tram services                                                                                                                     |
|                       | 1932 January                    | relocation to <i>Alto da Baleia</i>                                                                                                                         |
|                       | 1941 December                   | interruption of measurements                                                                                                                                |
| <i>Alto da Baleia</i> | 1951 October                    | Measurements are restated with the Unifilar of Elliott                                                                                                      |
|                       | 1952 January                    | installation of the QHM (nn. 190-191), precision 1 nT                                                                                                       |
|                       | 1952 November<br>– 1953 January | installation of the QHM (nn. 220-221), precision 1 nT                                                                                                       |
|                       | 1953 September                  | comparison with 3 instruments (QHM nn. 228, 229, 230) from the Committee on International Comparisons of Magnetic Standards, $\Delta = -5.4$ nT, in average |
|                       | 1955 July                       | QHM n. 220 is replaced by QHM n. 307                                                                                                                        |
|                       | 1959 August                     | comparison with instruments from the Committee on International Comparisons of Magnetic Standards, $\Delta = -9.3$ nT, in average                           |
|                       | 1968 April                      | comparison with instruments from the Committee on International Comparisons of Magnetic Standards, $\Delta = -18$ nT, in average                            |
|                       | 1976 August                     | comparison with instruments from the Committee on International Comparisons of Magnetic Standards, $\Delta = +24$ nT, in average                            |
|                       | 2006 May                        | end of measurements                                                                                                                                         |

**Table S2**

Metadata for the I data set: dates of the instrument replacements, relocations, changes in the measurement/calculation procedures etc.

|                       | date                    | metadata                                                             |
|-----------------------|-------------------------|----------------------------------------------------------------------|
| <i>Cumeada</i>        | 1876 September          | Inclinometer of Dover, precision 1'                                  |
|                       | 1922 November           | New needles                                                          |
|                       | 1928 September          | New needles                                                          |
|                       | 1929 May                | opening of the electrical tram services                              |
|                       | 1931 January            | Simultaneous measurements at 2 sites                                 |
|                       | 1932 January            | relocation to <i>Alto da Baleia</i>                                  |
| <i>Alto da Baleia</i> | 1935 October            | Sartorius earth inductor, precision 0.2-0.5'                         |
|                       | 1938 December           | end of measurements                                                  |
|                       | 1939 January – 1940 May | The data for this time interval are absent from the COI annual books |

**Table S3**

Metadata for the Z data set: dates of the instrument replacements, relocations, changes in the measurement/calculation procedures etc.

---

|                       | date         | metadata                                                                                        |
|-----------------------|--------------|-------------------------------------------------------------------------------------------------|
|                       | 1951 October | beginning of absolute measurements with BMZ n. 69                                               |
|                       | 1953 January | installation of BMZ (n. 80);<br>comparison of instruments $BMZ_{69} - BMZ_{80} = 25 \text{ nT}$ |
| <i>Alto da Baleia</i> | 1963 January | no specific records about Z measurements in the Observatory logbooks before this date           |
|                       | 1963 June    | mirror adjustment of the Askania variometer implied a baseline change                           |
|                       | 1977 January | installation of BMZ (n. 130)                                                                    |
|                       | 2006 May     | end of measurements                                                                             |

---

**Table S4.** Metadata for the D data set: dates of the instrument replacements, relocations, changes in the measurement/calculation procedures etc. (adapted from Morozova et al., 2014).

|                       | date                         | metadata                                                                                                                 |
|-----------------------|------------------------------|--------------------------------------------------------------------------------------------------------------------------|
| <i>Cumeada</i>        | 1875 July (?)                | new method to calculate D was applied; new azimuth mark was calculated                                                   |
|                       | 1878 January                 | Unifilar of Elliot was installed                                                                                         |
|                       | 1919 January                 | new procedure to compute the data                                                                                        |
|                       | 1930 January                 | tram line installation                                                                                                   |
|                       | 1932 January                 | relocation to <i>Alto da Baleia</i>                                                                                      |
|                       | 1948 October –<br>1951 March | no measurements, data in the annual books were interpolated                                                              |
| <i>Alto da Baleia</i> | 1951 October                 | reinstallation of variographs; new routines for absolute measurements                                                    |
|                       | 1955 July                    | installation of a new declinometer (Askania) – after comparison with former Elliot no significant differences were found |
|                       | 1989 May                     | small instrumental problems and construction in the nearby area                                                          |
|                       | 1990 June-July               | small instrumental problems and construction in the nearby area                                                          |
|                       | 1994 May                     | change of the suspension wire                                                                                            |
|                       | 2003 March                   | change of the suspension wire; correction already applied                                                                |
|                       | 2006 January                 | new instrument was installed in 2006/06; the correction of -6' was applied to the data starting in 2006/01               |

**Table S5.**

A list of European observatories (EOs) used to obtain the reference series for H, I and Z. Some stations have changes in the instruments and/or were re-located.

|    | name                    | code | country        | lat.    | long.    | period                                              | Used as reference series for... |
|----|-------------------------|------|----------------|---------|----------|-----------------------------------------------------|---------------------------------|
| 1  | Parc Saint-Maur (Paris) | PSM  | France         | 48° 49' | 2° 30'   | 1883-1900                                           | H, I, Z                         |
|    | Val Joyeux              | VLJ  |                | 48° 49' | 2° 01'   | 1901-1936                                           |                                 |
|    | Chambon-la-Foret        | CLF  |                | 48° 01' | 2° 16'   | 1936-1956;<br>1957-1967;<br>1968-1982;<br>1983-2011 |                                 |
| 2  | Nantes                  | NTS  | France         | 47° 15' | 358° 26' | 1923-1958                                           | H, I                            |
| 3  | Perpignan               | PER  | France         | 42° 42' | 02° 53'  | 1886-1901;<br>1907-1910                             | H, I                            |
| 4  | Toledo                  | TOL  | Spain          | 39° 53' | 355° 27' | 1947-1981                                           | H, Z                            |
|    | San Pablo de los Montes | SPT  |                | 39° 33' | 355° 39' | 1981-2011                                           |                                 |
| 5  | Ebro (Tortosa)          | EBR  | Spain          | 40° 49' | 0° 30'   | 1909-1937;<br>1943-1983;<br>1995-2009               | H, I, Z                         |
| 6  | Logrono                 | LGR  | Spain          | 42° 27' | 357° 30' | 1957-1976                                           | H, Z                            |
| 7  | San Fernando            | SFS  | Spain          | 36° 28' | 353° 48' | 1880-1963;<br>1964-1969;<br>1970-1979               | H, I, Z                         |
|    | San Fernando            | SFS2 |                | 36° 30' | 353° 53' | 1991-2005                                           |                                 |
| 8  | Oslo                    | OSL  | Norway         | 59° 55' | 10° 43'  | 1843-1930                                           | H, I                            |
| 9  | Prague                  | PRA  | Czech Republic | 50° 05' | 14° 25'  | 1830-1926                                           | H                               |
| 10 | Eskdalemuir             | ESK  | UK             | 55° 19' | 356° 48' | 1908-2011                                           | H, I, Z                         |
| 11 | Greenwich               | GRW  | UK             | 51° 29' | 0° 0'    | 1840-1925                                           | H                               |
| 12 | Munich                  | MNH  | Germany        | 48° 09' | 11° 37'  | 1841-1886;<br>1899-1926                             | H, I                            |
| 13 | Potsdam                 | POT  | Germany        | 52° 23' | 13° 4'   | 1890-2011                                           | H, I, Z                         |
| 14 | Lisbon                  | LIS  | Portugal       | 38° 43' | 350° 51' | 1858-1900                                           | H, I                            |
| 15 | L'Aquila                | AQU  | Italy          | 42° 23' | 13° 19'  | 1960-2009                                           | H, Z                            |

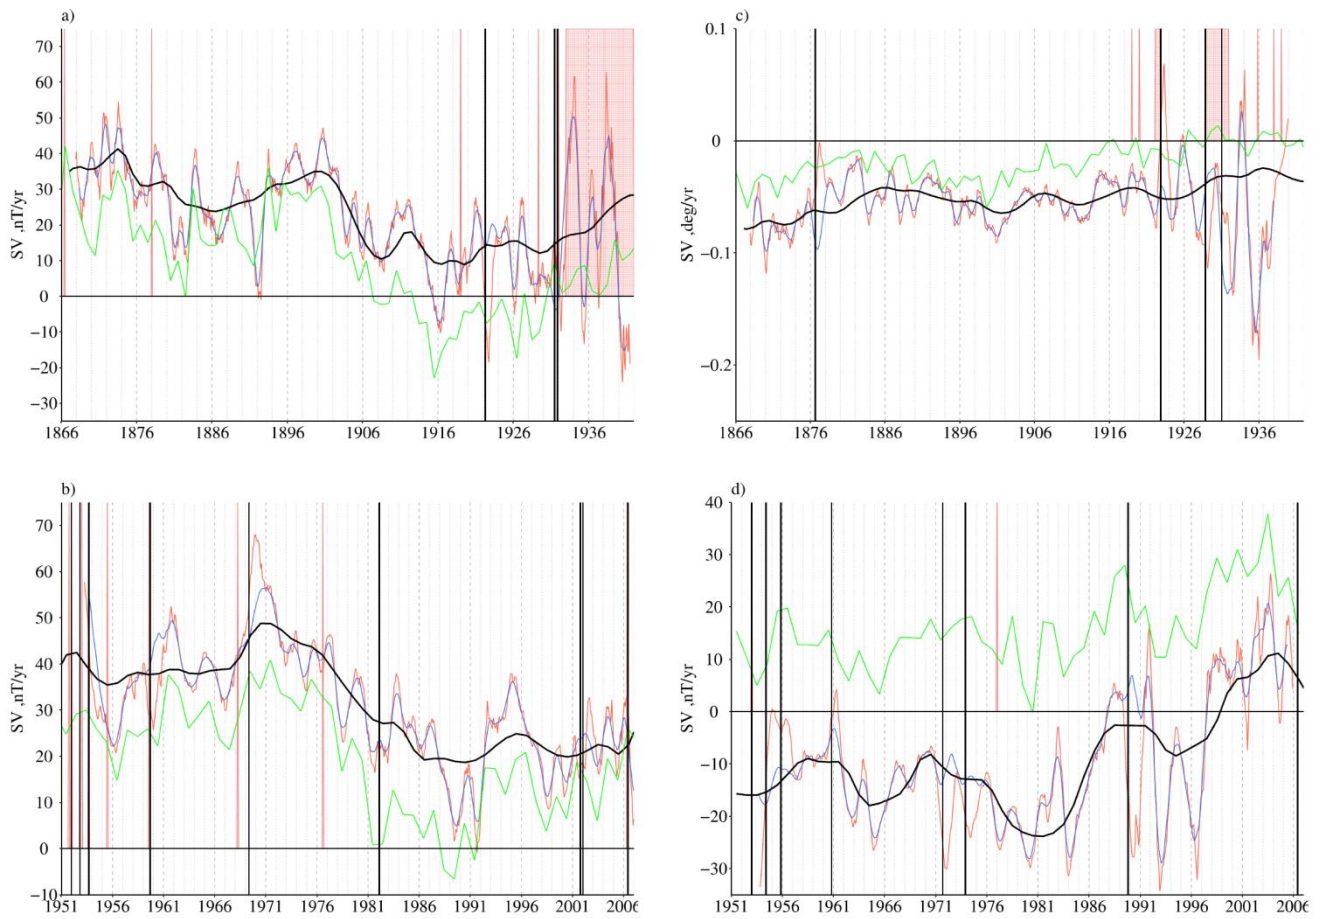

**Figure S1.** Original (red lines) and corrected (blue lines) COI SV H (a and b), I (c) and Z (d) series smoothed by the moving averaging with 12-month long window, SV from the corresponding COV-OBS model (black lines) and SV of the reference series from the EO observatories (green lines). Pink vertical lines/rectangles mark possible dates of HB, black vertical lines mark dates of corrections.

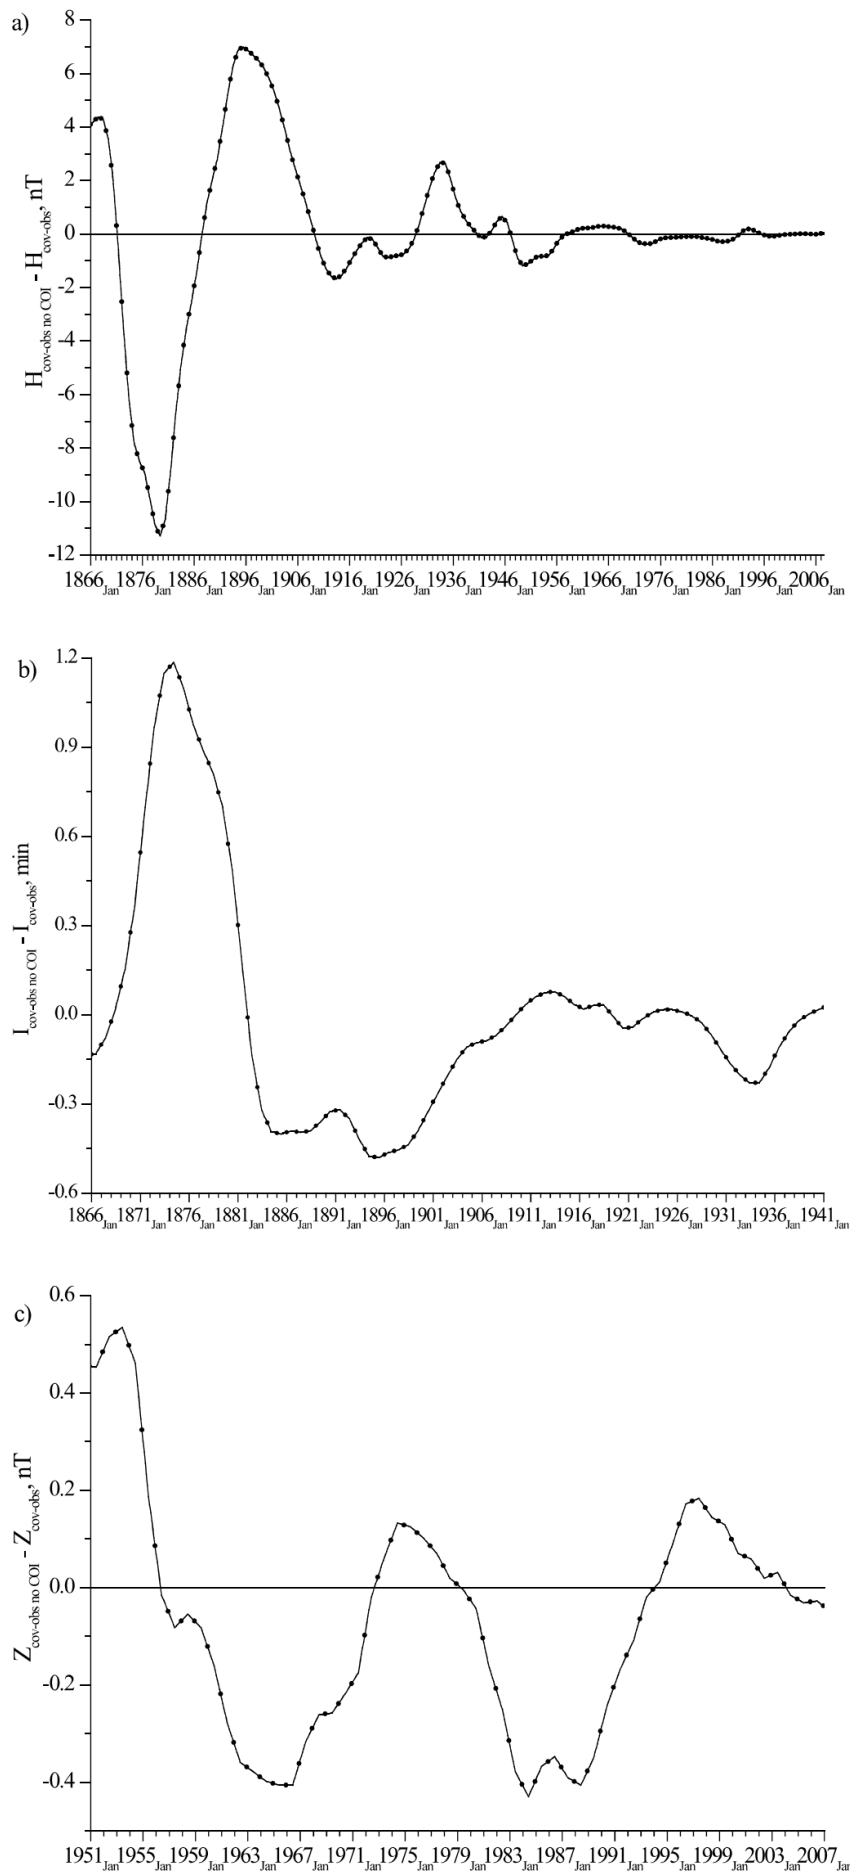

**Figure S2.** Differences between two models: COV-OBS and COV-OBS without COI: H (a), I (b), and Z (c) components.



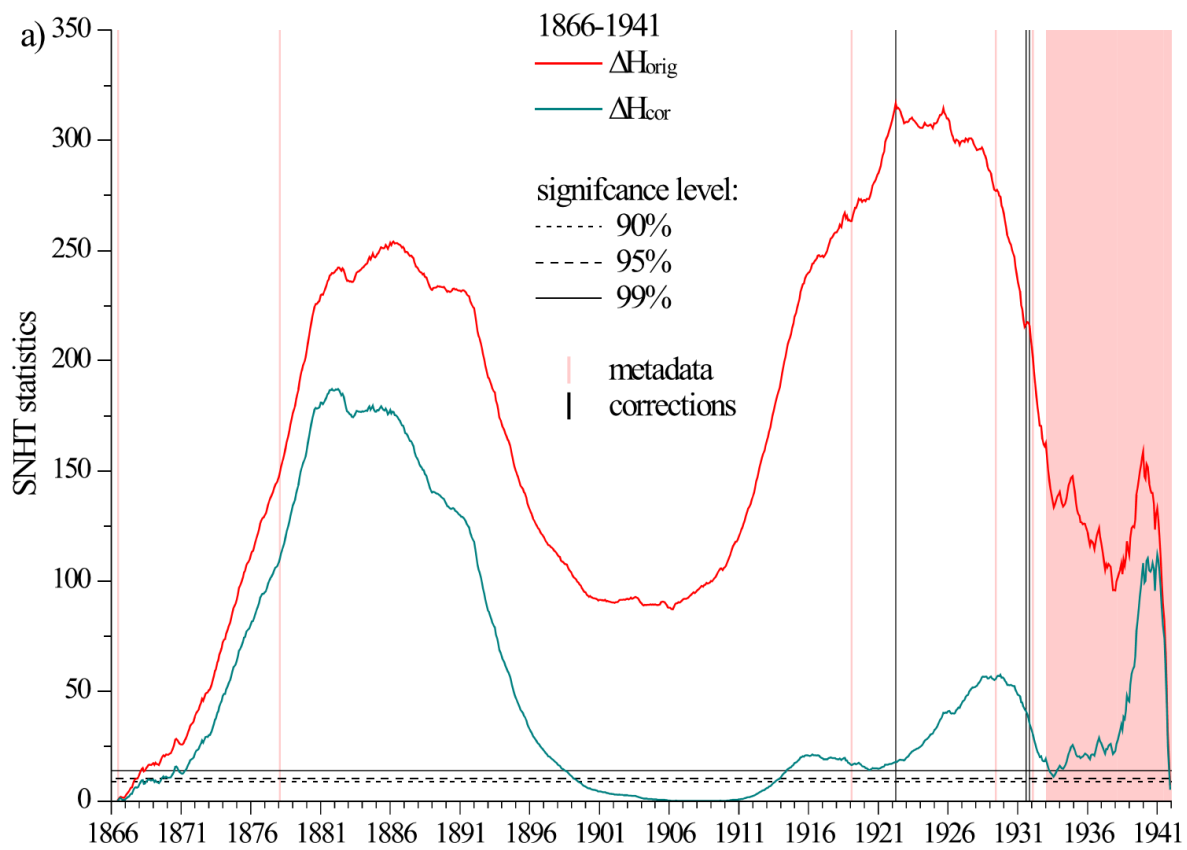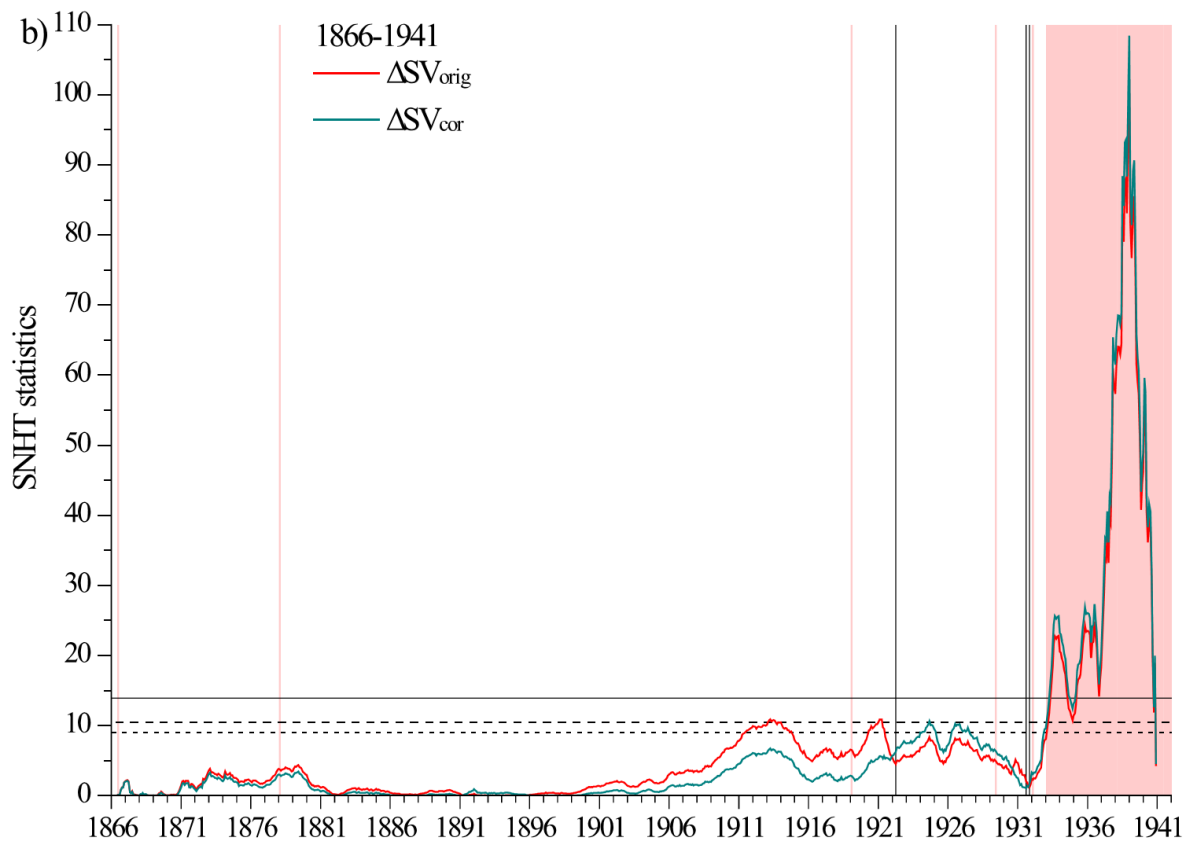

**Figure S3.** Homogeneity tests statistics for COI: H (a) and SV (b) original (red) and corrected (dark cyan) series for the time interval 1866-1941. Pink vertical lines/rectangles mark possible dates of HB, black vertical lines mark dates of corrected HBs. Dotted, dashed and solid horizontal lines mark levels of 90%, 95% and 99% of the statistical significance of HBs.

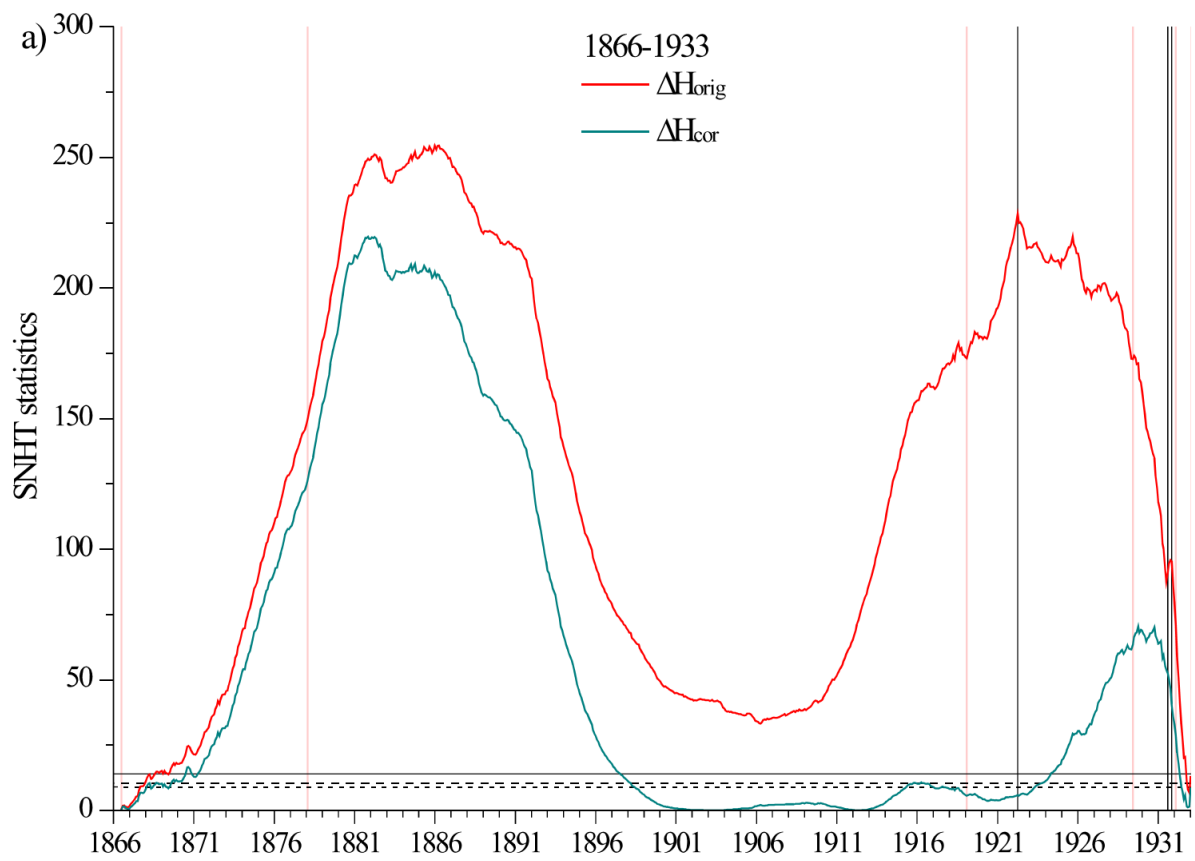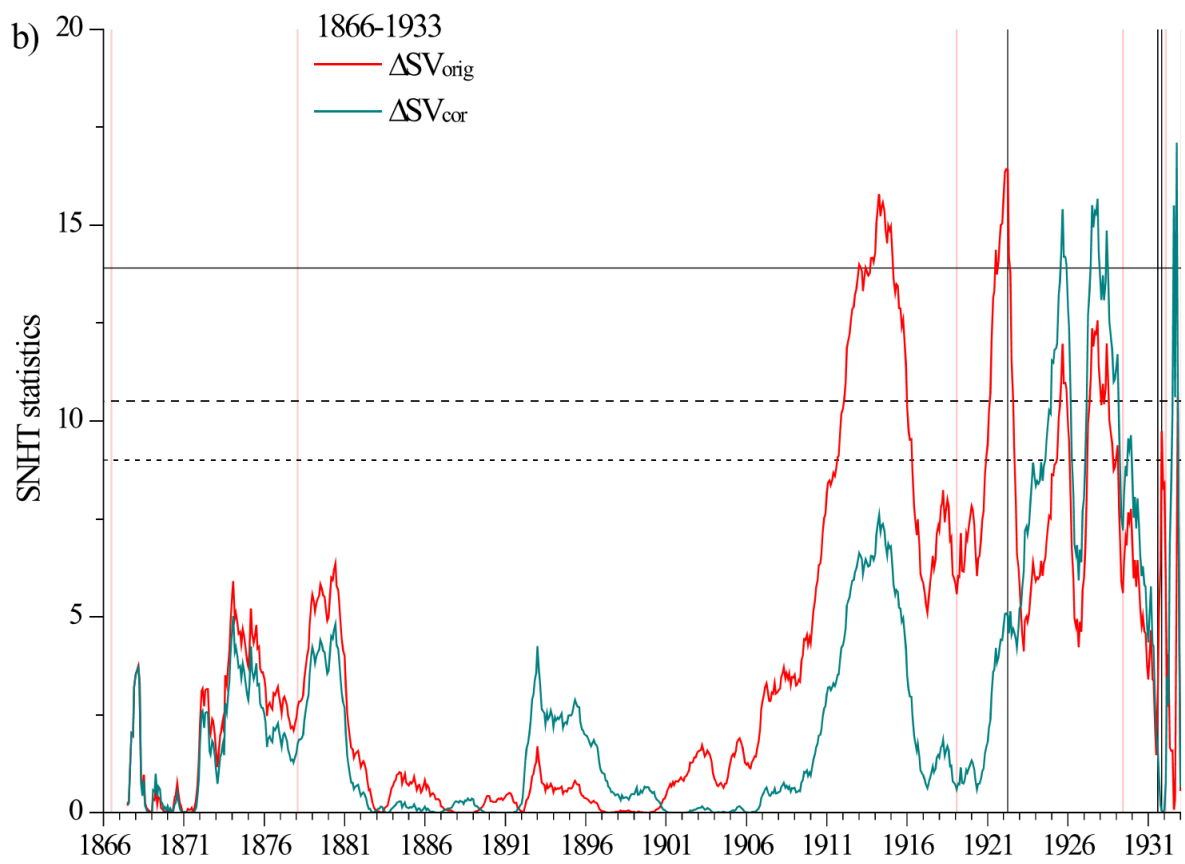

**Figure S4.** Same as Figure S3 but for the time interval 1866-1933.

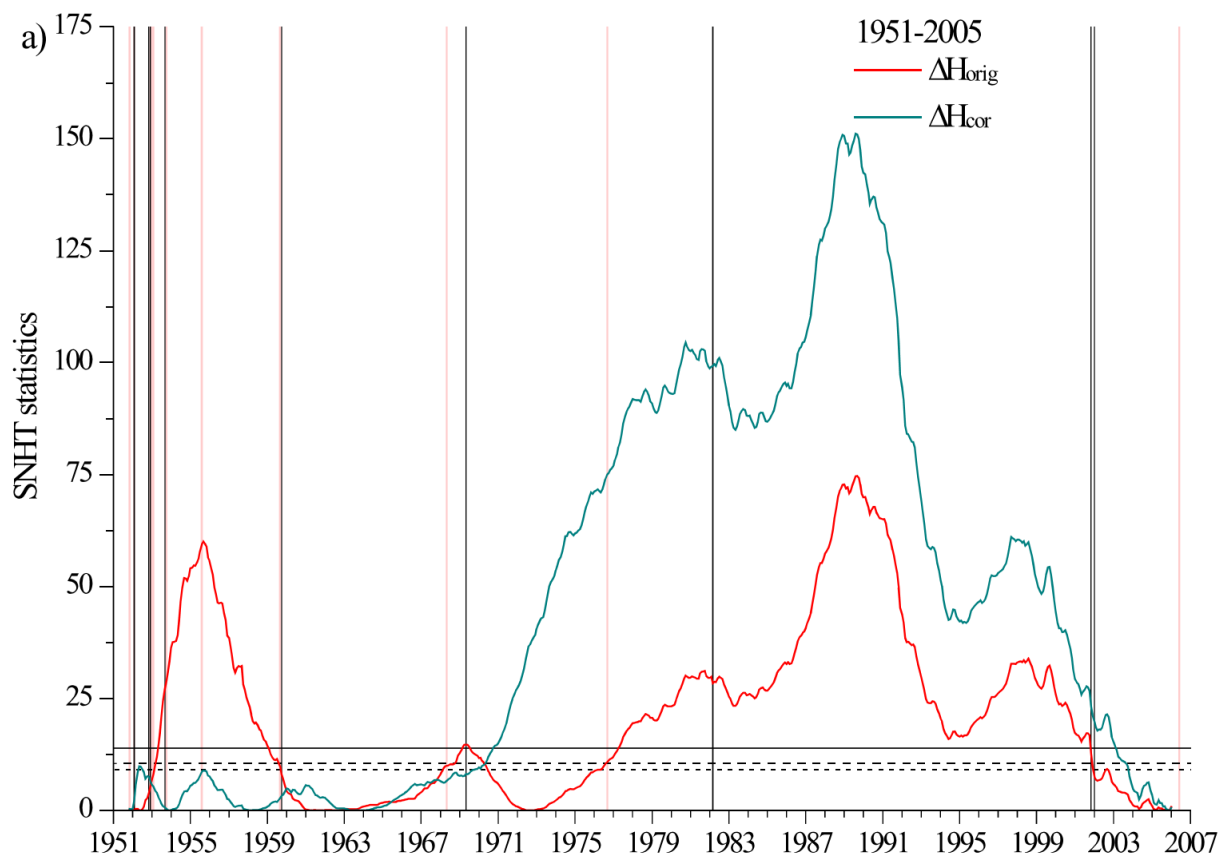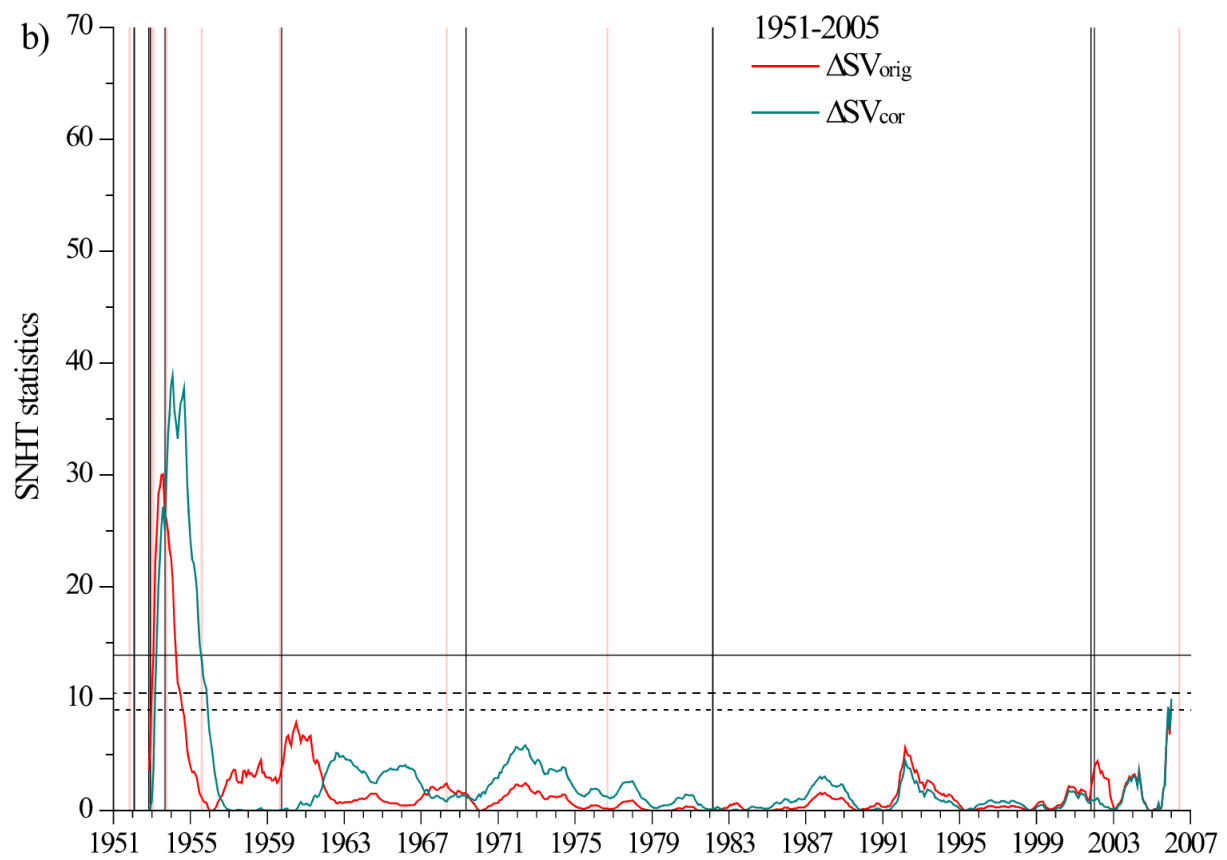

**Figure S5.** Same as Figure S3 but for the time interval 1951-2005.

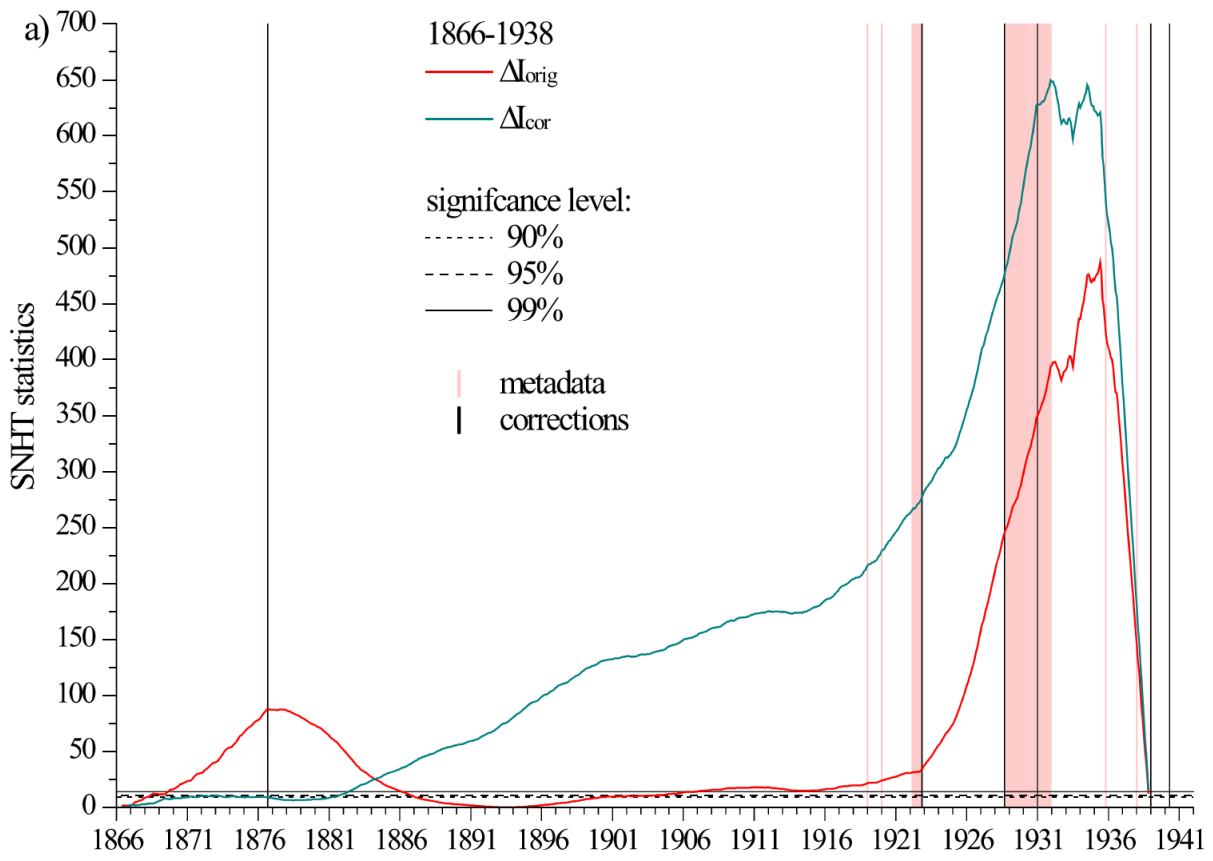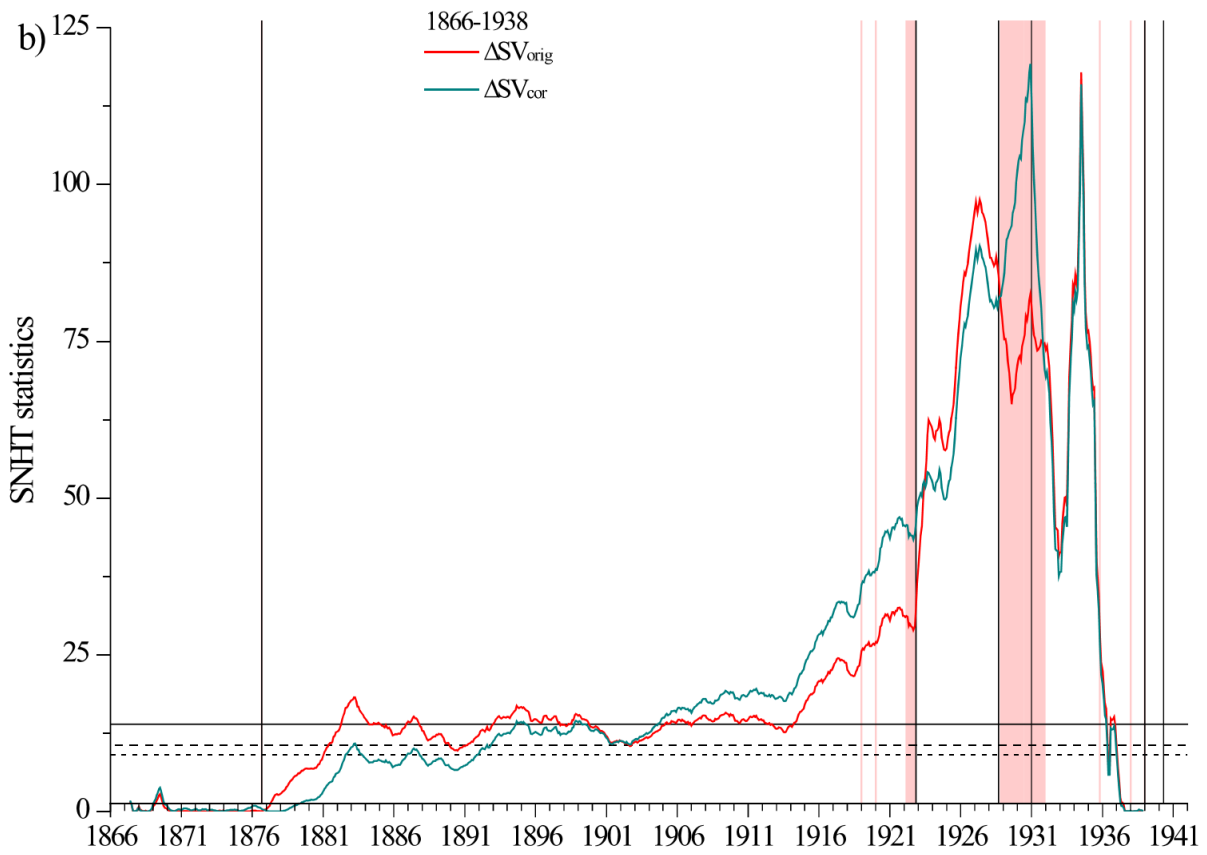

**Figure S6.** Same as Figure S3 but for COI I. Time interval: 1866-1938.

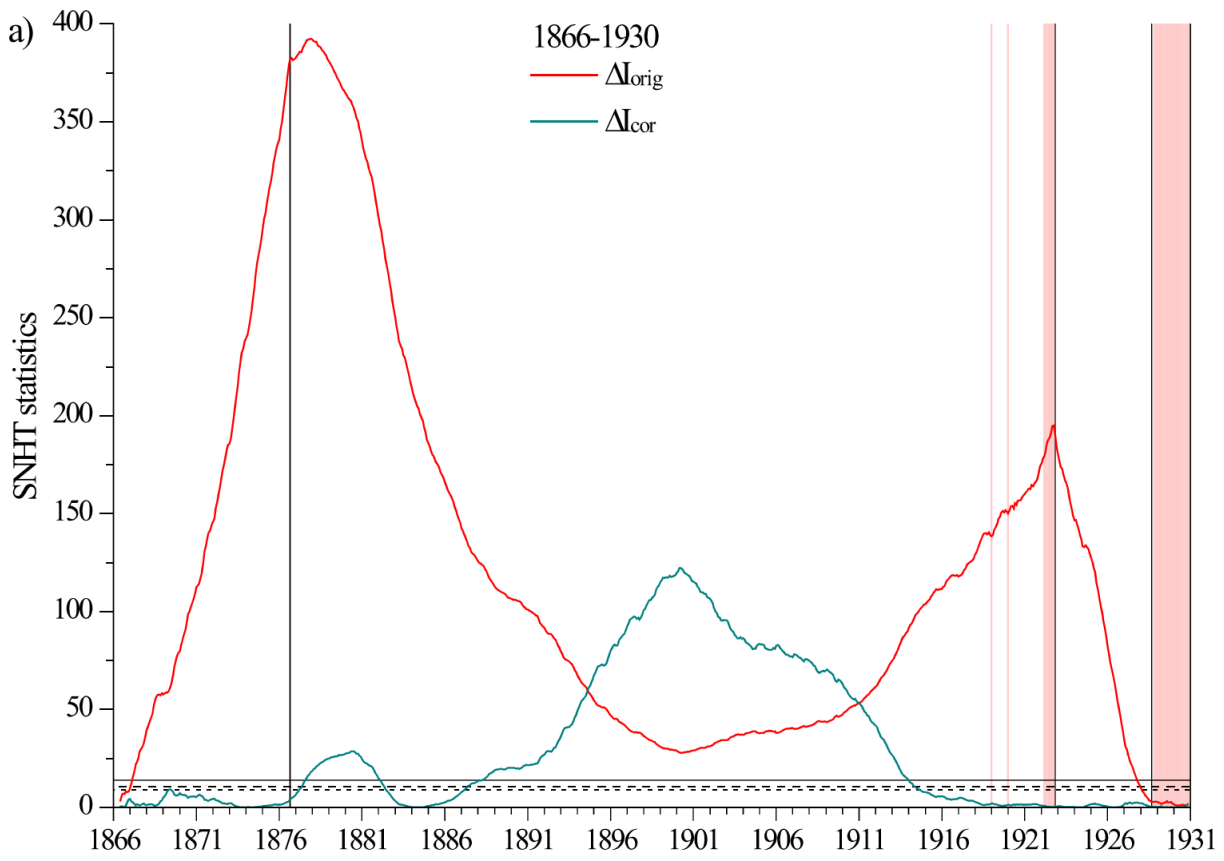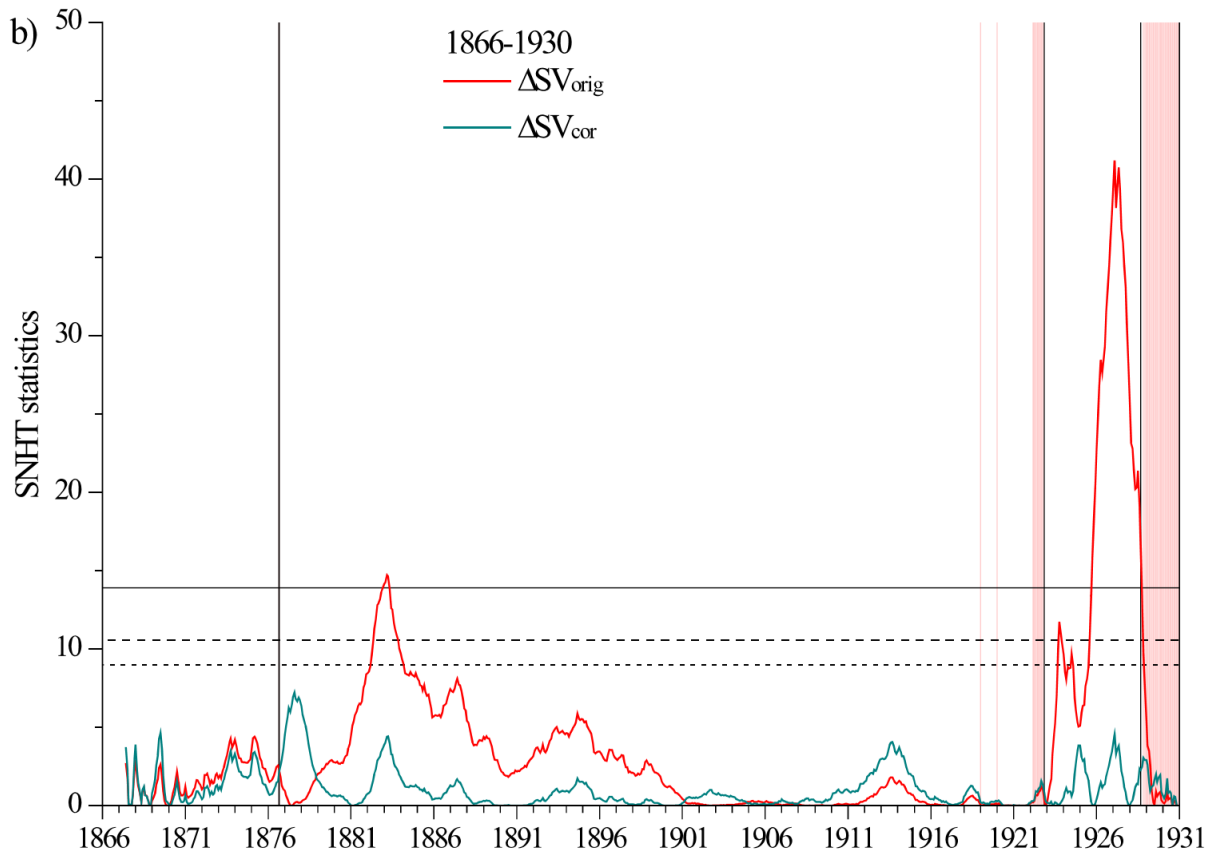

**Figure S7.** Same as Figure S6 but for the time interval 1866-1930.

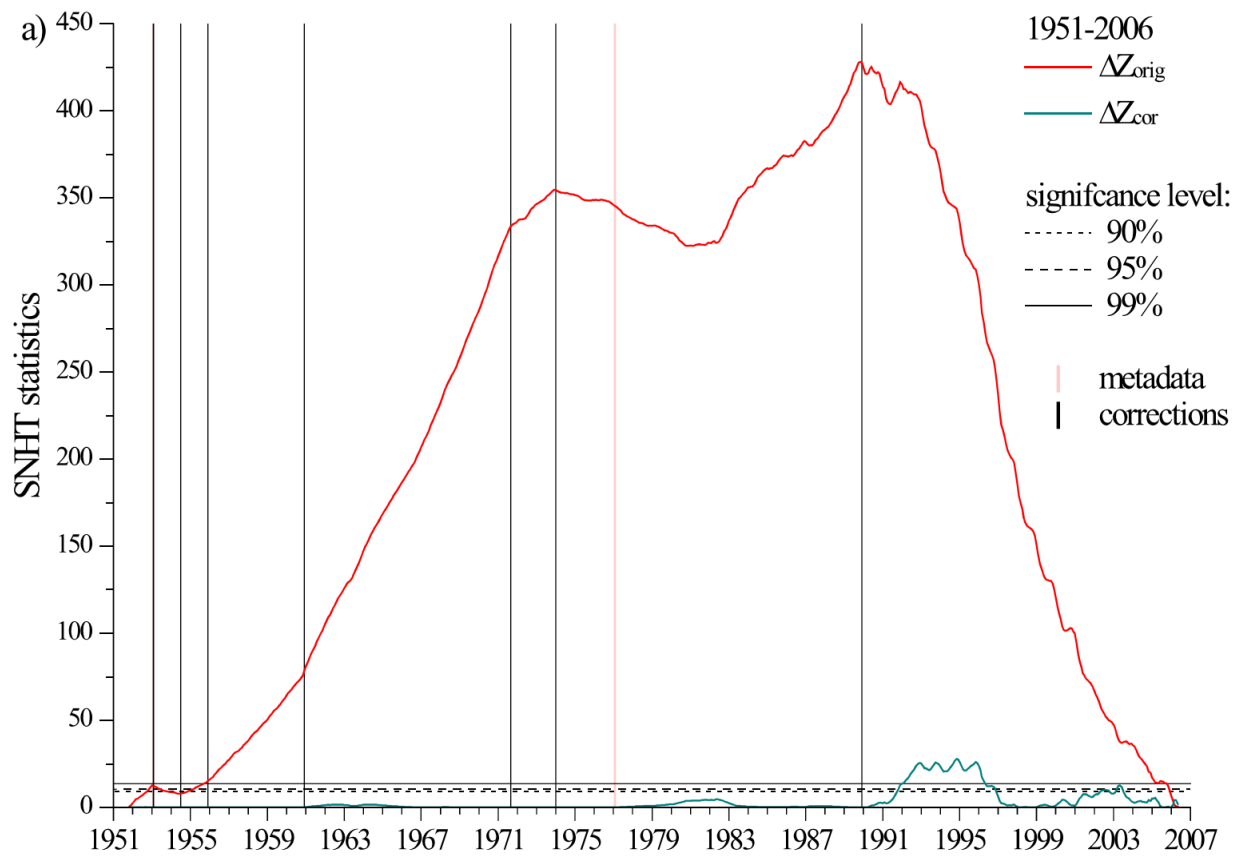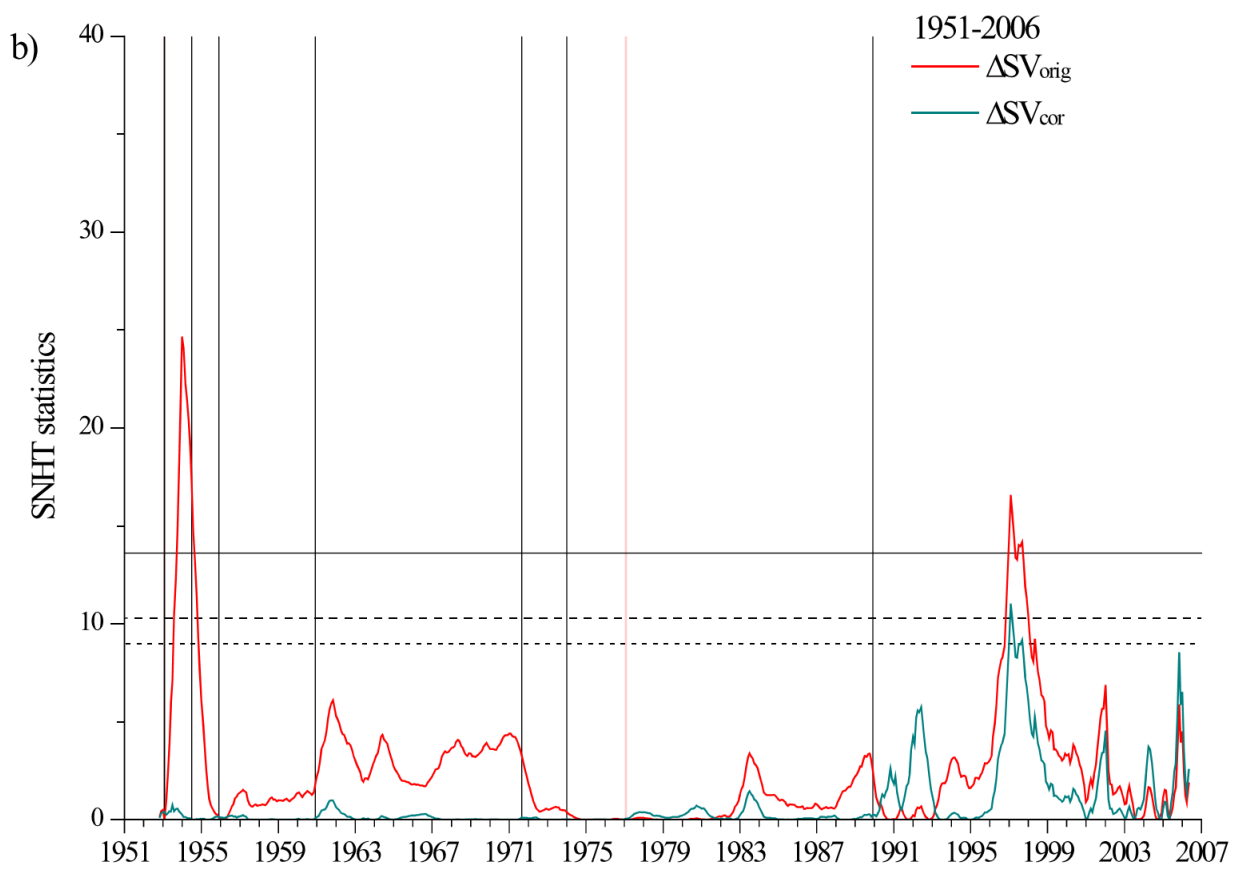

**Figure S8.** Same as Figure S3 but for COI Z. Time interval: 1951-2006.

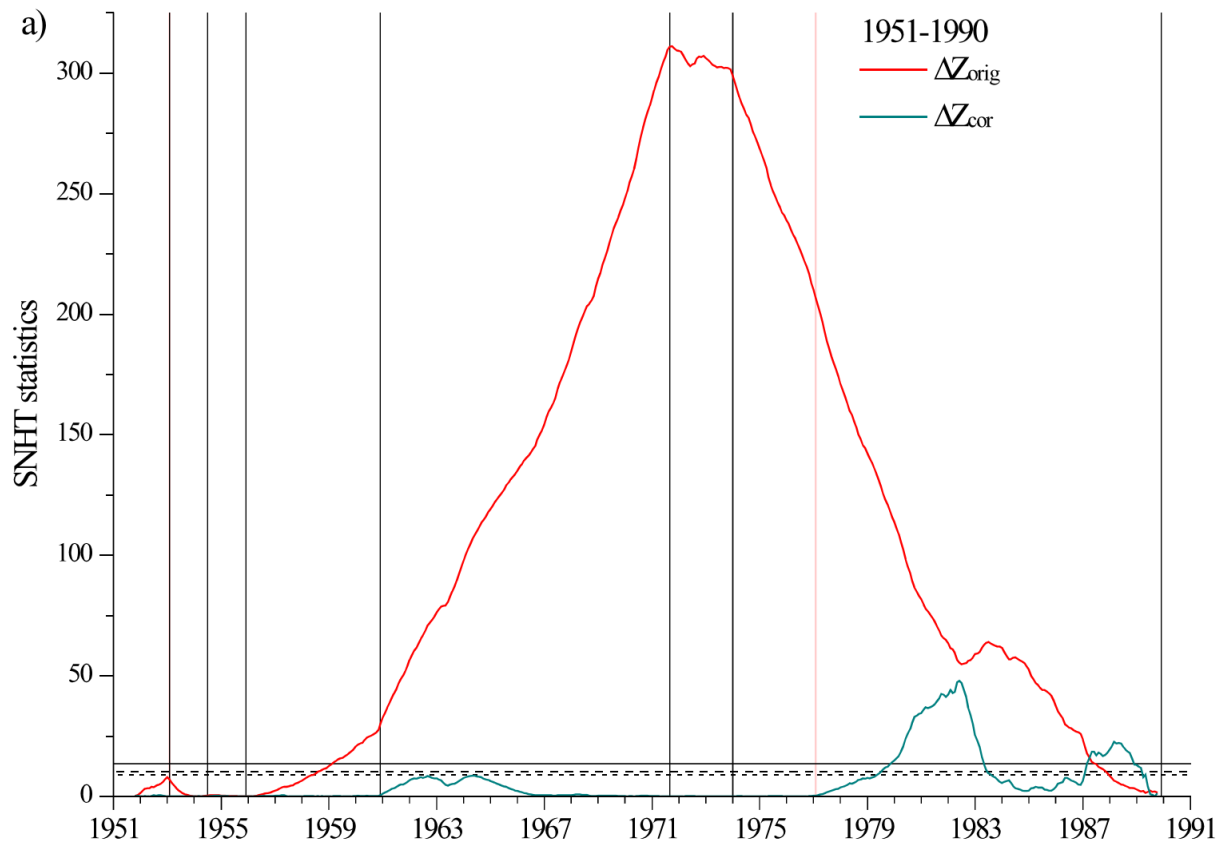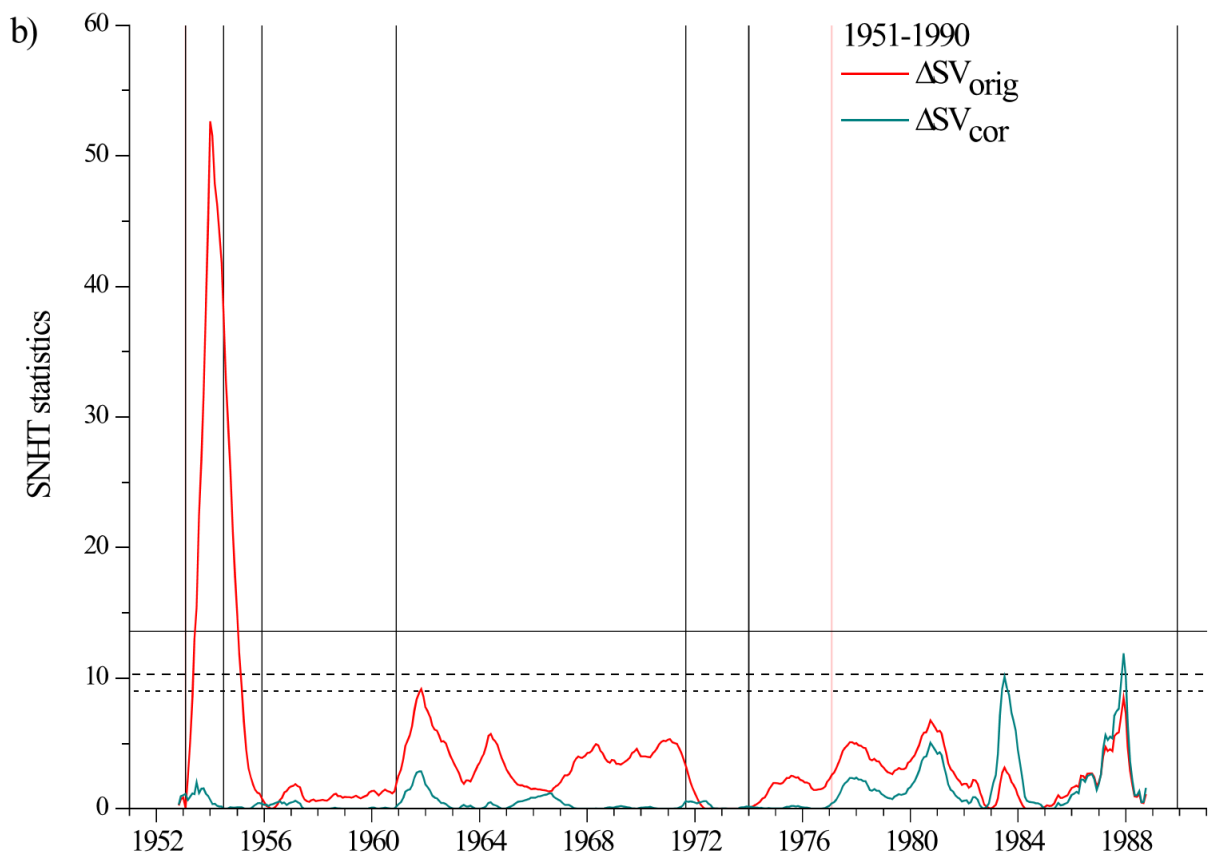

**Figure S9.** Same as Figure S8 but for the time interval 1951-1990.

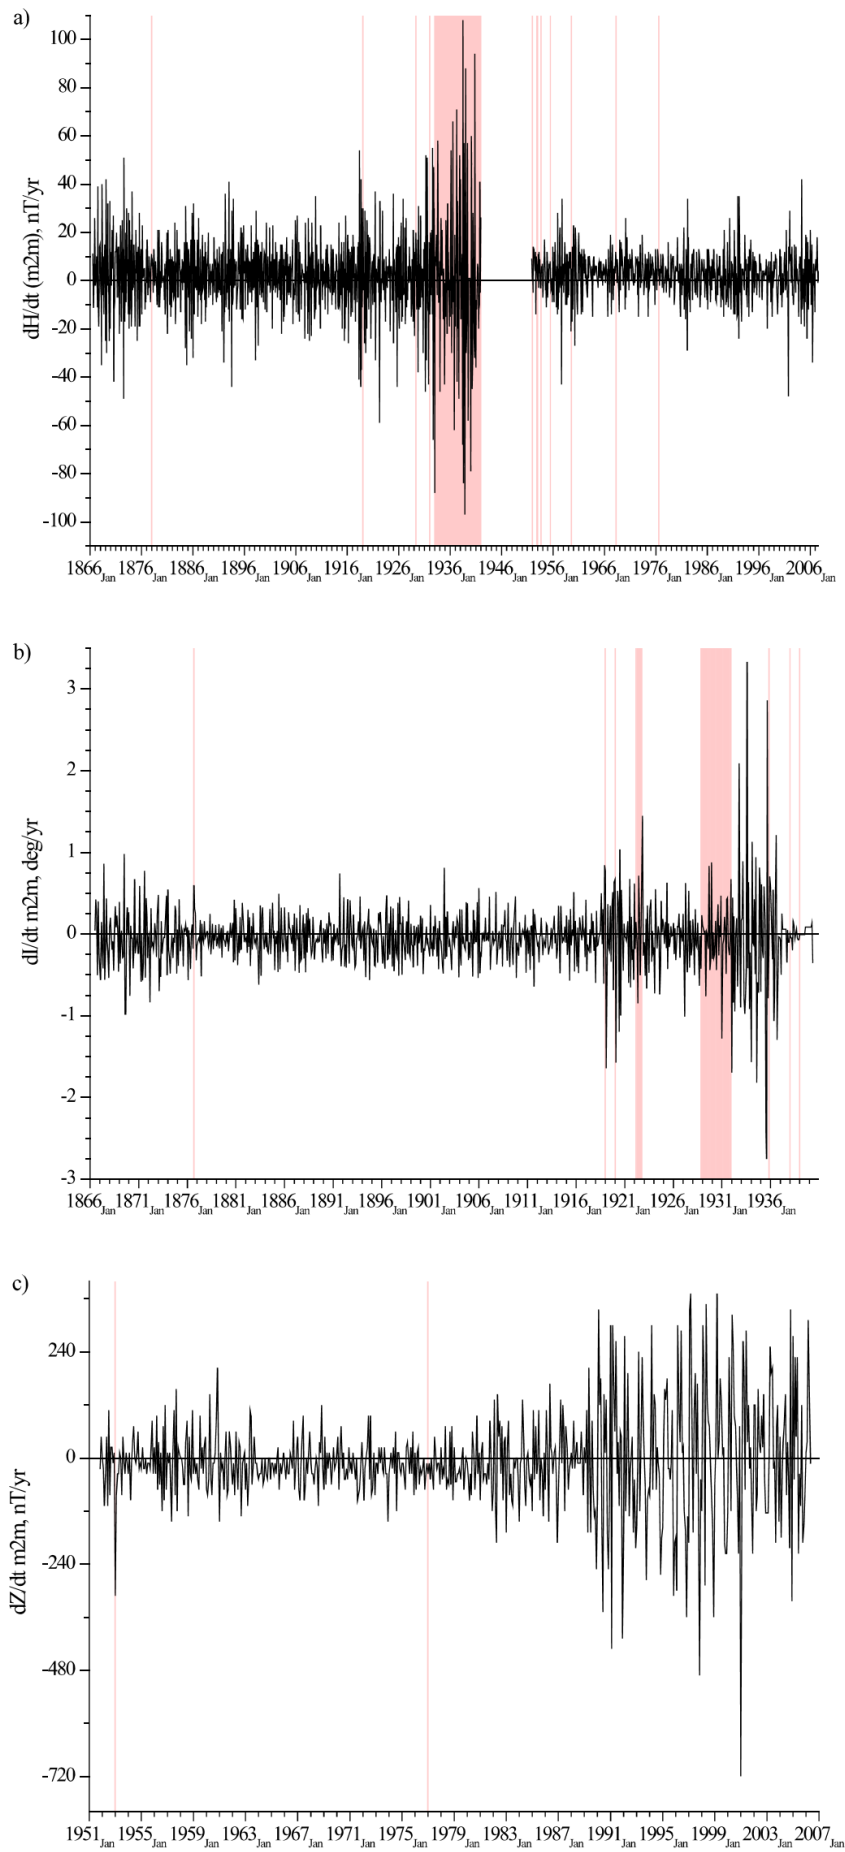

**Figure S10.** Time derivative of the original COI: H (a), I (b) and Z (c) series on month-to-month time scale. Pink vertical lines/rectangles mark possible dates of HB.



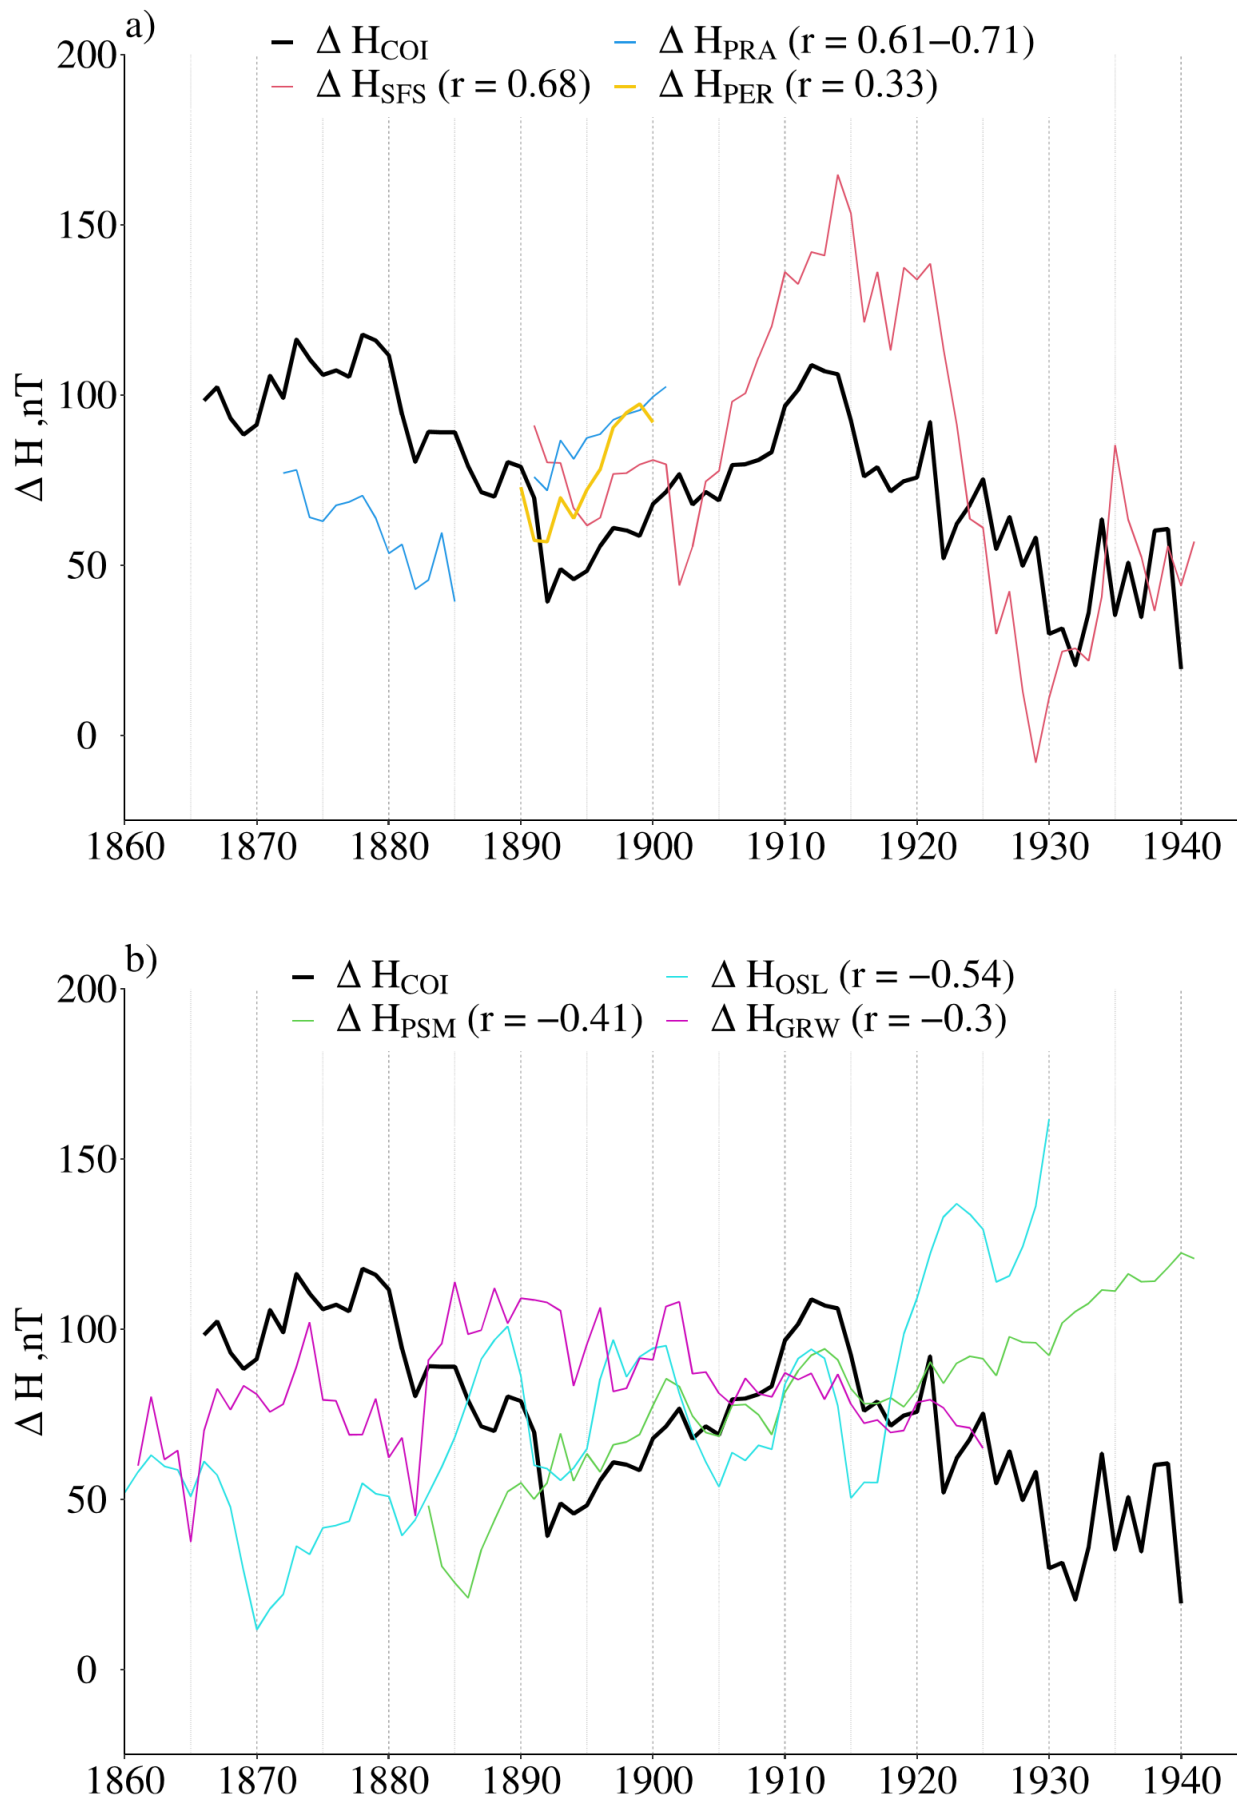

**Figure S11.**  $\Delta H$  series for the 1860-1940 time interval for seven European stations. (a) COI (thick black), SFS (red), PRA (blue) and PER (yellow). (b) COI (thick black), PSM (green), OSL (cyan) and GRW (magenta).

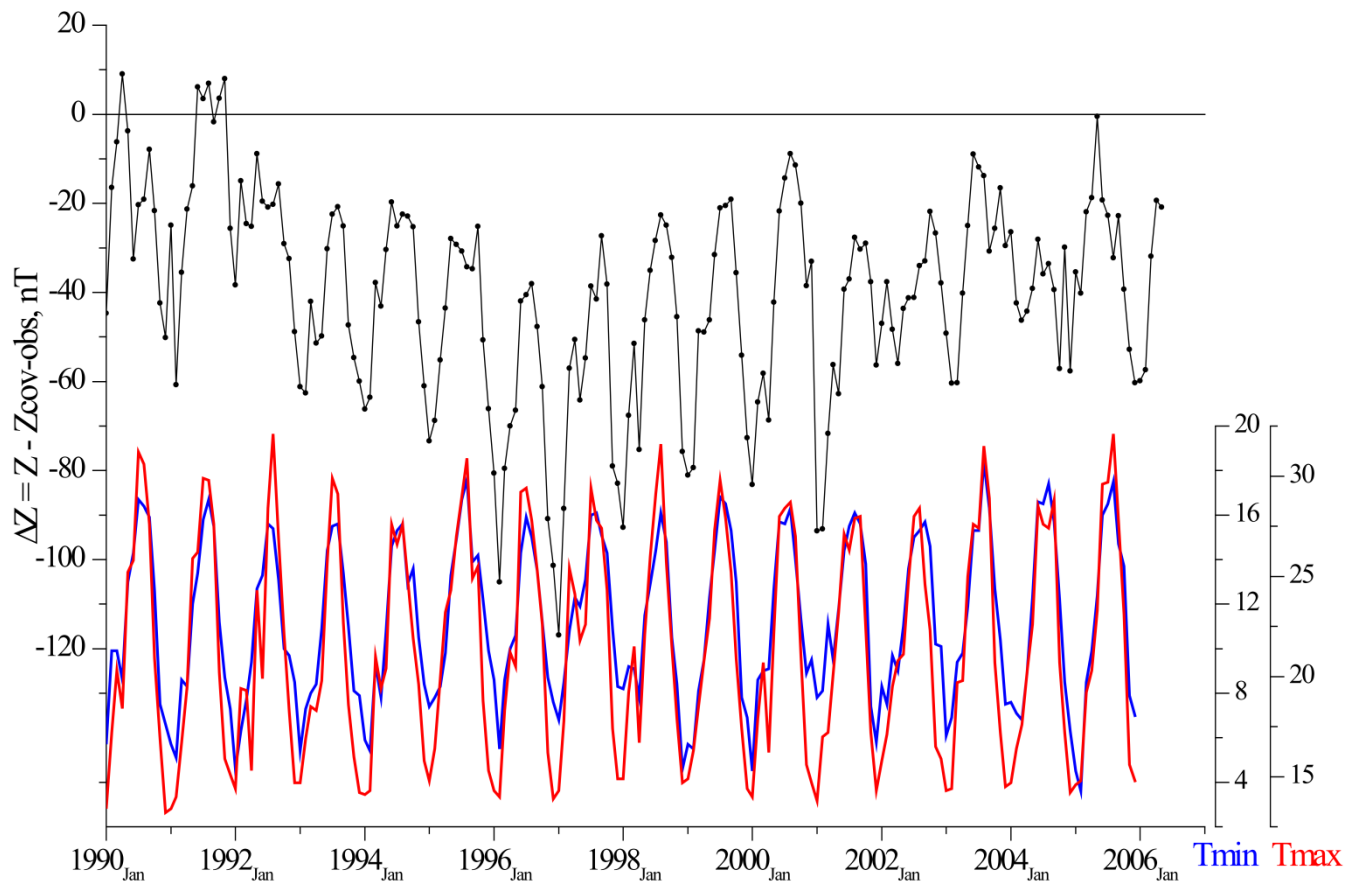

**Figure S12.**  $\Delta Z$  (black line with dots) for the 1990-2006 period together with monthly mean COI temperature series (red - Tmax, blue - Tmin).
